1 Introgression makes waves in inferred histories of effective

2 population size

3

4 John Hawks

5

6 Revision March 27, 2017

7

8 Affiliation:

9

10 Department of Anthropology

11 University of Wisconsin-Madison

12 email: [jhawks@wisc.edu](mailto:jhawks@wisc.edu)

13

14 Keywords:

15 demography, archaic humans, PSMC, gene flow, population growth

## 16 **Abstract**

17 Human populations have a complex history of introgression and of changing population  
18 size. Human genetic variation has been affected by both these processes, so that  
19 inference of past population size depends upon the pattern of gene flow and  
20 introgression among past populations. One remarkable aspect of human population  
21 history as inferred from genetics is a consistent “wave” of larger effective population  
22 size, prior to the bottlenecks and expansions of the last 100,000 years. Here I carry out a  
23 series of simulations to investigate how introgression and gene flow from genetically  
24 divergent ancestral populations affect the inference of ancestral effective population  
25 size. Both introgression and gene flow from an extinct, genetically divergent population  
26 consistently produce a wave in the history of inferred effective population size. The time  
27 and amplitude of the wave reflect the time of origin of the genetically divergent  
28 ancestral populations and the strength of introgression or gene flow. These results  
29 demonstrate that even small fractions of introgression or gene flow from ancient  
30 populations may have large effects on the inference of effective population size.

## 31 **Introduction**

32 The origins of today's modern human populations included introgression or gene flow  
33 from genetically divergent ancestral populations of archaic humans. Direct evidence of  
34 this ancient introgression comes from the ancient DNA of Neandertals, which  
35 contributed between 1 and 4 percent of the genetic makeup of today's populations  
36 outside Africa (Green et al., 2010; Prüfer et al., 2013) and from the Denisova 3 genome,  
37 which represents an archaic population that contributed up to 5 percent of the genetic  
38 makeup of today's Melanesian and Australian populations (Reich et al., 2010; Reich et  
39 al., 2011; Meyer et al., 2012; Prüfer et al., 2013). No ancient DNA evidence from any  
40 archaic human skeletal remains within Africa has yet been recovered. However,  
41 abundant indirect evidence exists of introgression from genetically divergent  
42 populations into the ancestral populations of living Africans. Genetic comparisons  
43 extending to whole genomes now show the signature of archaic human introgression in  
44 samples of various populations within Africa (Lachance et al., 2012; Hsieh et al., 2016b;  
45 Beltrame et al., 2016).

46  
47 At the same time, whole-genome analyses have added a longer-term dimension to our  
48 understanding of human population size over time (Li and Durbin, 2011; Mallick et al.,  
49 2016). But the inference of changes in effective population size depends in part upon  
50 the same features of genetic data that allow the inference of introgression. The genetic  
51 variation within a population is a product not only of its size but also its structure, and  
52 many aspects of human population history may complicate the understanding of

53 effective population size (Hawks, 2008). While it is possible to explicitly employ complex  
54 population history models to generate estimates of past population size and structure  
55 (e.g., Schaffner et al., 2005), our ability to probe evidence of extinct “ghost” populations  
56 that contributed introgression or gene flow into living people is extremely limited.

57

58 Some studies have examined how demic expansion may have interacted with archaic  
59 human introgression during the expansion of modern human populations into Eurasia  
60 (Currat and Excoffier, 2011; Sugden and Ramachandran, 2016). However, the effects of  
61 introgression upon signatures of ancient population growth that predate the dispersal  
62 of modern humans into Eurasia have not previously been subject to close examination.  
63 Hence, it is valuable to look directly at how a history of introgression or gene flow  
64 between populations may affect the inference of ancestral effective population size.

65

66 **History of human effective population size.** Statistical methods such as the pairwise  
67 sequential Markovian coalescent (PSMC) (Li and Durbin, 2011) make it possible to infer  
68 changes in effective population size over time based upon the time to most recent  
69 common ancestor (TMRCA) of alleles of single genetic loci, extended across many loci up  
70 to whole genomes. The TMRCA indirectly reflects the genealogical coalescence of  
71 alleles, conditioned on the probability of mutations and recombination in each  
72 generation. Under a Wright-Fisher population model, the probability of coalescence of  
73 two alleles in a single generation is  $1/2N_e$ , and if the effective size in such a population  
74 changed in the past, different intervals of time will have different probabilities of

75 coalescence. Li and Durbin (2011) showed the effectiveness of this approach to inferring  
76 changes in past population size as applied to single diploid genomes. They found that  
77 although the recent population history of human groups differs, for the time intervals  
78 prior to 100,000 years ago, different human genomes give repeatable and consistent  
79 estimates of effective population size.

80

81 These approaches have been applied to many samples of living humans as well as to  
82 ancient human genomes (e.g., Li and Durbin, 2011; Prüfer et al., 2013; Mallick et al.,  
83 2016). Several aspects of human population histories as inferred from the PSMC  
84 approach are notable. Non-African population samples reflect a bottlenecked history in  
85 which the ancestral effective size was rather strongly reduced between 100,000 and  
86 50,000 years ago. Some sub-Saharan African populations also show a moderate  
87 reduction in effective size across that time interval, which may reflect either their own  
88 population history or admixture from populations of Eurasian origin, possibly via North  
89 Africa (Mallick et al., 2016). Sub-Saharan hunter-gatherer populations do not present  
90 any evidence of such a population bottleneck prior to 50,000 years ago, although their  
91 current population sizes are relatively small. All living human population samples in the  
92 period before 100,000 years ago show a similar inferred pattern of changes in effective  
93 population size. In broad terms looking backward into the past, this population history  
94 resembles a “wave” in which the effective size was large around 100,000—200,000  
95 years ago, gradually smaller further back in time, with a minimum between 500,000 and  
96 1 million years ago, and then gradually larger in the period before a million years ago

97 (Figure 1). The inference of larger ancestral effective population size prior to 1 million  
98 years ago is repeated across different populations. It is also evident when considering  
99 genomes from archaic humans, specifically high-coverage Neandertal and Denisovan  
100 genomes from Denisova Cave, Russia (Prüfer et al., 2013). These genomes reflect an  
101 extremely small ancestral effective size through most of the evolutionary history of  
102 these groups back to their differentiation from other human populations before 500,000  
103 years ago. But in the interval preceding their divergence, both samples share an inferred  
104 history of effective population size similar to that of living human populations. The  
105 inference of higher effective population size in the earliest part of human origins is also  
106 evident from rare genomic insertions (Huff et al., 2010). Both the replication in ancient  
107 genomes with very different recent population histories, and the evidence for a similar  
108 expansion from non-SNP datasets providing corroborating evidence that the appearance  
109 of a “wave” in effective population size is not merely an artifact of the PSMC method.

110

111 **History of introgression.** Statistical evidence for introgression comes from joint  
112 consideration of local heterozygosity and recombination in genetic samples.  
113 Recombination and mutation are both random processes that occur over time, leading  
114 to the expectation that regions of high local heterozygosity (because of a long history of  
115 mutations) should tend to be relatively short (because of an equally long history of  
116 recombination). If a population contains two long alleles that differ by a relatively large  
117 number of mutations, this suggests that some process may have suppressed  
118 recombination during the evolution of the locus. Relatively long, strongly linked

119 divergent haplotypes can occur within a random-mixing population for several reasons,  
120 including balancing selection or structural variation such as chromosomal inversion  
121 (Evans et al., 2006; Hawks et al., 2008). However, if such loci are statistically common  
122 including across regions without notable selective or structural constraints,  
123 introgression of alleles from a genetically divergent population is a likely explanation.  
124  
125 Plagnol and Wall (2006) developed an approach to test the hypothesis of introgression  
126 of DNA into a population from a genetically diverged ancestral population, using the  
127 statistic  $S^*$ . This method relies upon the idea that for a genetic locus with some  
128 proportion of introgressed DNA sequences, these sequences will tend to be  
129 distinguished by a relatively large number of single nucleotide variants that tend to be in  
130 linkage disequilibrium. Such a pattern repeated at many loci will appear inconsistent  
131 with random mating and therefore suggest some proportion of descent from one or  
132 more genetically divergent populations. Using this approach, Plagnol and Wall (2006)  
133 found evidence for introgression at a level of approximately 5% in multilocus data from  
134 European and from Yoruba samples, suggesting for the first time that intermixture with  
135 extinct populations had contributed substantially to the ancestry of African peoples as  
136 well as Eurasians. Significantly, the result preceded the recovery of ancient  
137 chromosomal DNA from Neandertal, Denisovan and early modern human specimens,  
138 which would demonstrate introgression based on direct genome comparisons (Green et  
139 al., 2010; Reich et al., 2010; Prüfer et al., 2013; Fu et al., 2015).  
140

141 In adapted form, the  $S^*$  approach has been applied by a series of investigators to African  
142 population samples. Hammer and colleagues (2011) found evidence for ancient  
143 introgression within samples of Biaka and San peoples, consistent with a model of 2%  
144 admixture from a genetically divergent population 35,000 years ago. They further found  
145 some candidate loci for introgression had widespread geographic distributions across  
146 Africa. Using whole-genome data from Western Pygmy, Hadza, and Sandawe  
147 individuals, Lachance et al. (2012) supported the hypothesis of introgression from an  
148 extinct population or populations with genetic divergence as great as the Neandertals.  
149 Some candidate loci for introgression were private within each population; others were  
150 shared across all three populations. Hsieh et al. (2016b) examined whole genome  
151 sequences from Baka and Biaka individuals, finding evidence for introgression from one  
152 or more genetically diverged populations extending over a possibly long period of time,  
153 with a pulse as recently as 9000 years ago.

154

155 Statistical modeling of introgression as applied to African population samples suggests  
156 an origin of some genetically divergent source populations for introgression around the  
157 time that Neandertals diverged from the ancestors of living African populations  
158 (Lachance et al., 2012), which we now think was prior to 700,000 years ago (Meyer et  
159 al., 2016). If these genetically divergent archaic populations originated from a common  
160 ancestral population around this time, then the probability of coalescence should have  
161 been relatively low during the time period immediately following the divergence of  
162 these populations, and higher during the time interval that immediately preceded this



163 original divergence. In other words, the scenario of introgression from genetically  
164 divergent ancestral populations appears to predict a low coalescence rate during much  
165 of the last 700,000 years, and a high coalescence rate earlier in time. Inferences from  
166 the genomes of living Africans, from PSMC and other approaches, appear to show a  
167 contrasting pattern: a “wave” of effective population size over time, with an increasingly  
168 low effective population size (increased probability of coalescence) in the period leading  
169 from 300,000 back to 700,000 years ago, and an increasingly large estimated effective  
170 size (lower probability of coalescence) going further back in time.

171

172 Here I investigate whether the evidence from effective population size is consonant with  
173 evidence of introgression in human ancestral populations in Africa. I carry out numerical  
174 simulations to investigate how introgression and gene flow among genetically divergent  
175 populations affect the probability of coalescence at different times in the populations’  
176 histories. I also examine how the mutation process may affect data that emerge from a  
177 population history with introgression or migration between genetically divergent  
178 populations. The question is how much, if any, of the apparent evidence for population  
179 size changes in the prehistory of African populations may be explained by gene flow or  
180 introgression from genetically divergent ancestors.

181

## 182 **Methods**

183 I consider here the case of independent, non-recombining genetic loci sampled from a  
184 single diploid genome in a population. This is convenient because of the relative

185 simplicity of the simulation model and the comparability to PSMC approaches that  
186 examine evidence from single diploid genomes (Li and Durbin, 2011; Prüfer et al., 2013;  
187 Mallick et al., 2016). The purpose of the model is to examine in what way introgression  
188 and gene flow may affect the probability of coalescence in specific time intervals related  
189 to known simulated population histories. This question is of interest even in cases  
190 where gene flow was common enough that recombination may not have been  
191 substantially suppressed (in other words, where gene flow among genetically divergent  
192 populations might not be characterized as “introgression”), and therefore might not  
193 reject the hypothesis of random mating under common statistical approaches for  
194 detecting introgression (Plagnol and Wall, 2006). The model applied here is not  
195 sufficient to investigate the ancestral recombination graph of a population or to  
196 examine the power of inferences about gene flow or introgression.

197

198 The probability of coalescence in a random-mating population is expected to be a  
199 function of the population size. Here I deal only with constant population sizes, to  
200 specifically examine the effect of population structure. The assumption of constant  
201 population size is of course unrealistic as applied to African populations of ancestral  
202 humans; many of these populations have grown substantially during the last 50,000  
203 years and possibly during much earlier time periods (Beltrame et al., 2016; Hsieh et al.,  
204 2016a; Mallick et al., 2016). These populations have also recently diversified in  
205 structure, with cross-coalescence among living African populations suggesting the  
206 existence of some aspects of today’s population structure going back to as much as

207 200,000 years (Mallick et al., 2016). Recent population expansions would have reduced  
208 the probability of coalescence during the last interval of African population evolution,  
209 but aside from increasing the proportion of loci that coalesce prior to these expansions,  
210 these recent events would not change the relative probabilities of coalescence before  
211 any proposed archaic introgression. The issue of structure versus size as influences on  
212 the probability of coalescence is taken up in the Discussion.

213

214 **Population model.** The population model is illustrated in Figure 2. In the model, a single  
215 Wright-Fisher population  $P_1$  of constant size is assumed to have existed from an  
216 indefinite time in the past up to the present day. At time  $T_0$ , this population  
217 instantaneously gave rise to a second population  $P_2$ . In each generation from  $T_0$  up to a  
218 second time,  $T_i$ , a proportion  $m$  of alleles in each population transferred to the other  
219 population, a symmetric island model of migration. At  $T_i$ , a fraction  $q$  of the alleles in  $P_1$   
220 are derived by introgression from  $P_2$ . The model assumes this introgression did not  
221 change the population size of  $P_1$ , which is unrealistic but not too poor for small  $q$ . Time  
222 is scaled in terms of  $2N$  generations, where  $N$  is the population size of  $P_1$  (which equals  
223 the population size of  $P_2$ ). This is a similar model to that considered by Plagnol and Wall  
224 (2006) and later authors (Hammer et al., 2011; Hsieh et al., 2016b), with the differences  
225 that it does not incorporate any recent population expansions and it adds the possibility  
226 of migration between the genetically diverged populations prior to the time of  
227 introgression, instead of assuming complete reproductive isolation.

228

229 The model was implemented on Mathematica version 11.0, using the coalescent  
230 probabilities for a two-allele case with migration as described by Hudson (1990). The  
231 two alleles have a probability  $1/2N$  of coalescing in each generation that they are in the  
232 same population, each has a probability  $q$  of transferring to  $P_2$  at time  $T_i$ , each has a  
233 probability  $m$  of transferring from its population into the other population between  $T_0$   
234 and  $T_i$ , and any allele in  $P_2$  at  $T_0$  will transfer to  $P_1$ . Source code is available from  
235 Figshare. Each parameter was allowed to vary over a range of values in simulations. For  
236 each combination of parameter values, 50,000 genealogies were obtained, and the  
237 coalescence time (TMRCA) for the two alleles was recorded, in generations scaled to a  
238 factor of  $2N$ . While the probability of coalescence within a single population is given by  
239  $2N$ , in the population model there are time increments where the effective probability  
240 of coalescence is less because of population structure. The effective probability of  
241 coalescence in a given time increment in the population model can be estimated as the  
242 ratio of the observed number of coalescence events in the time interval ( $c_i$ ) relative to  
243 all genealogies that coalesce in this and earlier time intervals ( $\sum_{j=i}^{\infty} c_j$ ). The effective  
244 population size in this time increment is then the reciprocal of the effective probability  
245 of coalescence.

246

247 **Mutation.** Genetic differences between alleles sampled in diploid humans reflect not  
248 only the genealogy of the alleles (modeled by the coalescent) but also the random  
249 process of mutation. Because mutations are rare events, the mutational process exerts  
250 substantial “noise” upon any attempt to estimate the TMRCA of a given locus. Sharp

251 changes in the probability of coalescence will likely appear to be smeared across a  
252 relatively long period of time (Li and Durbin, 2011), and slight or short-term fluctuations  
253 might not be evident by examining the distribution of mutations. To examine the effects  
254 of the mutation process on the apparent TMRCA distribution, neutral mutations were  
255 added to the genealogies in a selected number of simulations. Under a constant rate of  
256 random neutral mutations, the expected number of mutations separating two alleles,  
257  $E(H)$ , is a product of the neutral rate of mutations per site per generation,  $\mu$ , the  
258 length of the locus in nucleotides,  $L$ , and 2 times the TMRCA in generations. In these  
259 simulations, the number of mutations for a given genealogy was modeled as a Poisson-  
260 distributed random variable with mean  $E(H)$ . The mutation rate,  $\mu$ , was assumed to  
261 equal  $3.5 \times 10^{-8}$  per site per generation, and the length of each sampled locus was  
262 assumed to be 50,000 base pairs. Across 50,000 replicates, this roughly approximates  
263 the total length of a human genome.

264

## 265 **Results**

266 A population model with introgression or migration between genetically divergent  
267 ancestral populations affects the distribution of TMRCA between two alleles by  
268 suppressing the effective probability of coalescence in the period when alleles may be  
269 resident in different genetically divergent populations. Figure 3 shows the TMRCA  
270 distribution in a population history with no introgression or migration, in which the  
271 effective probability of coalescence (Figure 3a) and the inferred effective population size  
272 (Figure 3b) are constant over time, with fluctuation only due to sampling. By

273 comparison, a population history with introgression shows a sharp discontinuity in the  
274 effective probability of coalescence (Figure 3c) and inferred effective population size  
275 (Figure 3d) at the time of initial divergence of the genetically divergent ancestral  
276 populations.

277

278 Adding mutations to the genealogies results in a substantial smoothing of the history of  
279 inferred effective population size. Figure 4 contrasts the inferred effective population  
280 size based upon the distribution of TMRCA from the coalescent (Figure 4a) with the  
281 inferred effective population size as estimated based on pairwise mutational differences  
282 between simulated 50-kb segments (Figure 4b). The sharp change in the effective  
283 probability of coalescence produced by the population model is smoothed substantially  
284 into a wave when mutations are added. Without modeling recombination, these results  
285 are not formally compatible with the history of effective population size for human  
286 genomes as inferred by PSMC. But the “wave” appearance of the population history as  
287 inferred from independent simulated loci is very similar in form to the wave that  
288 appears in PSMC-generated human population histories.

289

290 The results show very little difference when comparing sudden introgression versus  
291 slow, long-term gene flow. Both these processes result in a wave of similar form in the  
292 inferred history of effective population size (Figure 5). The key feature of the data in  
293 both cases is the initial divergence of populations at  $T_0$  in the model. The transition from  
294 a random-mating ancestral population to two partially isolated populations separates

295 two intervals with respectively high and low probabilities of coalescence, and the sharp  
296 transition is smoothed by adding mutations to the resulting genealogies. Whether  
297 subsequent migration between the populations is sudden or continuous, it has broadly  
298 similar results on the inferred history of effective population size.

299

300 The amount of introgression or gene flow from the genetically divergent ancestral  
301 population ( $P_2$  in the population model considered here) determines the height of the  
302 wave of inferred effective population size. Figure 6 demonstrates the effect of different  
303 levels of introgression on the inferred population history. Human data are consistent  
304 with a 1.5 to 3-fold change in effective population size from the trough to the crest of  
305 the wave. This level of change in population size would require a rather large  
306 contribution of the genetically divergent ancestral population, for example, a level of  
307 introgression of 10% at 50,000 years ago combined with 0.2 migrants per generation (=  $2Nm$ )  
308 between  $T_0$  and  $T_i$  in the model. Alternatively, it is possible that populations  
309 involving introgression from multiple genetically divergent ancestors might explain the  
310 height of the wave in inferred effective population size.

311

312 The time intervals affected by the wave of effective population size are determined by  
313 the time  $T_0$  in the population model considered here. Figure 7 shows the effect of this  
314 time of population divergence upon the wave, with successively older times of  
315 divergence giving rise to both older waves and waves of greater amplitude, all other

316 parameters being held constant. Evidence of introgression from populations that  
317 diverged earlier in time is stronger than for populations that diverged more recently.  
318  
319 The time scale in all figures here is expressed in terms of  $2N$  generations. If this scale  
320 were translated into terms of human population history, under the assumption that  
321 humans have a long-term  $N = 10,000$  and a generation length of 25 years, then a value  
322 of “1” on the time axis of each chart would be equivalent to 500,000 years ago (=20,000  
323 generations), “2” would be equivalent to 1 million years ago, and “5” at the rightmost  
324 side of each graph is equivalent to 2.5 million years ago. Based on this relationship, it is  
325 possible to find the best-fit value of  $T_0$  in comparison with published inferences of  
326 human effective population size history. One such population history is illustrated in  
327 Figure 7b. Again, under the assumption that  $N = 10^4$  in the ancestral African population,  
328 introgression or gene flow from a genetically divergent ancestral population that  
329 diverged between 400,000 and 800,000 years ago would provide an acceptable match  
330 to PSMC inferences of human effective population size.  
331  
332 Human effective population histories inferred by PSMC and other approaches  
333 consistently show a larger effective population size in periods earlier than a million  
334 years ago. The models considered here do not consistently produce this aspect of  
335 published inferences of prehistoric human effective sizes. There are instances in which  
336 the inferred effective population size does appear higher in the earliest phases of the  
337 population history, for example, Figure 5b and Figure 6c. These are deviations from the



338 expectation that the effective size will be  $2N$  prior to the divergence of genetically  
339 differentiated populations at  $T_0$ , which can be explained by random fluctuations among  
340 the small sample of genealogies that have TMRCA earlier than around  $3N$  generations.  
341 However, even such examples do not really appear to match the consistently larger  
342 effective size inferred for human populations prior to a million years ago.

343

## 344 Discussion

345 Human populations had varied histories in the last 100,000 years, but in time intervals  
346 prior to 100,000 years ago, PSMC has generated very similar inferred histories of  
347 effective population size for different present-day populations. The results of this study  
348 suggest that some aspects of this consistent inferred population history can be  
349 explained by gene flow or introgression from genetically divergent ancestral  
350 populations. The wave of human population history during the period between 100,000  
351 and 1 million years ago is best matched by introgression or gene flow from populations  
352 that diverged between 500,000 and 1 million years ago. This is a similar range of values  
353 as obtained by approaches that use other aspects of human genetic data to infer a  
354 history of introgression, not only in the ancestry of non-African populations  
355 (Sankararaman et al., 2014; Vernot and Akey et al., 2015), but in the ancestry of today's  
356 African populations (Plagnol and Wall, 2006; Hammer et al., 2011; Lachance et al., 2012;  
357 Hsieh et al., 2016b).

358

359 It is notable in the results that a very small fraction of introgression (on the order of 5%  
360 or less, Figure 4b, 6b and 6c) still gives rise to a pronounced wave in the inferred history  
361 of effective population size. Likewise, a very small amount of long-term gene flow also  
362 gives rise to a pronounced wave. Figure 5a, with  $2Nm = 0.2$ , uses a rate of gene flow less  
363 than one-twentieth the rate compatible with the current  $F_{ST}$  of human global  
364 populations. How can a small fraction of introgression or gene flow have such a large  
365 effect on inferred ancestral effective population sizes? This may seem paradoxical  
366 considering that small amounts of introgression have a very small effect on genome-  
367 wide heterozygosity, which is the primary evidence for long-term effective population  
368 size. Introgression from Neandertals, for example, has not greatly increased the  
369 heterozygosity of non-African populations despite the great genetic divergence between  
370 Neandertal and modern genomes. But PSMC approaches go well beyond genome-wide  
371 heterozygosity to examine the distribution of heterozygosity across regions of the  
372 genome. It thus draws upon higher moments of a complex distribution, which is  
373 affected by gene flow and introgression in complex ways. Introgression may slightly  
374 decrease or increase the fraction of genetic loci that occur in a narrow window of  
375 heterozygosity values, when under neutrality only a small fraction of loci occur in that  
376 window to begin with. Hence, introgression or gene flow may have an outsized effect on  
377 the inference of effective population size for the time intervals that correspond to these  
378 differences.

379

380 Nothing about these results is inconsistent with the hypothesis that some large changes  
381 in actual population size may have occurred in the distant ancestry of human  
382 populations, irrespective of introgression or gene flow. In fact, under the population  
383 model considered here, the effective population size of the ancestral population *as a*  
384 *whole* is indeed larger during the time that ancestral lineages may exist within the  
385 genetically divergent second population. The inference of a larger effective size is  
386 accurate, it is simply explained by the presence of a ghost population. Ghost populations  
387 that are sources of introgression or gene flow are also ancestors of living human  
388 populations. The central point is that both population size and structure affect the  
389 relevant aspects of genetic variation, which means we cannot make progress  
390 understanding one demographic phenomenon without also considering the other.  
391  
392 PSMC examination of Neandertal and Denisovan genomes shows that their ancestral  
393 populations underwent a very different population history from the African ancestors of  
394 living human populations after they diverged (Prüfer et al., 2013). On the other hand,  
395 for the time intervals prior to the divergence of these archaic human populations, their  
396 inferred history of effective population size was congruent with the inferred history of  
397 living human populations (Figure 1b). The time that these histories come into  
398 congruence likely reflects the time of genetic divergence of these populations; it also  
399 approximates the minimum point in the wave of inferred human effective population  
400 size history. It is a good hypothesis that this minimum point in fact corresponds to the  
401 time immediately before the divergence of Neandertal and Denisovan from African

402 human populations, when the probability of coalescence was highest between  
403 introgressed alleles in living non-Africans and the alleles that had been resident in the  
404 African ancestors of living non-Africans. In this case, the later part of the wave,  
405 representing higher inferred effective population size in human ancestral populations, is  
406 what may be explained by introgression or gene flow with genetically divergent archaic  
407 human groups. For present-day populations of non-Africans, this introgression came in  
408 part from Neandertals. Inside Africa, it may have been from other archaic human  
409 groups, with approximately the same inferred divergence date as Neandertals, as  
410 suggested by Lachance et al. (2012).

411

412 However, there are reasons to be skeptical of this scenario. The Neandertals and  
413 Denisovans share a common stem population, so the fact that they both have a similar  
414 history of divergence from the African ancestors of modern humans is not a chance  
415 coincidence. But it would be remarkable if one or more African archaic human  
416 populations mirrored precisely the same population history. Many different genetically  
417 divergent source populations for introgression may have existed within Africa, from  
418 archaic human populations as represented by the Kabwe, Florisbad, or Iwo Eleru crania,  
419 to “near-modern” human populations that nonetheless were strongly morphologically  
420 variable (reviewed by Stringer, 2016; Bräuer, 2008), possibly to highly-divergent hominin  
421 populations such as *Homo naledi* (Berger et al., 2015). Yet with all these candidates as  
422 possible sources for introgression, living populations in Africa have almost the same  
423 inferred history of effective population size as non-Africans across the period that these

424 source populations diverged from each other. The similarity of inferred population  
425 histories for these different living groups of humans with different histories of  
426 introgression deserves more critical examination.

427

428 Likewise deserving of investigation is the inference of larger effective population size of  
429 human ancestral populations prior to 1 million years ago (Figure 1). The results from  
430 PSMC that point to a larger effective size in these distant ancestors are paralleled by  
431 approaches using rare insertion polymorphisms (Huff et al., 2010), suggesting a real  
432 phenomenon. It may be that this larger effective size reflects different population  
433 dynamics in the distant ancestors of humans, as may also be present in great ape  
434 species like chimpanzees, gorillas, and orangutans, which each have larger inferred  
435 effective population sizes than humans. Such dynamics may include introgression from  
436 genetically divergent populations of earlier hominins prior to 1 million years ago. This  
437 kind of introgression has already been documented for the Denisova 3 genome (Meyer  
438 et al., 2012; Prüfer et al., 2013). A number of morphologically diverse hominin  
439 populations inhabited Africa prior to 1 million years ago, and hybridization and  
440 introgression among them may have been an important part of the evolution of the  
441 genus *Homo*. This relatively remote interval of human population history is represented  
442 by only a small fraction of genetic loci across the genome, but may illuminate a key time  
443 in the origin of humans.

444

445 The discovery that introgression has contributed substantial variation into modern  
446 human populations has had great significance for the understanding of human variation  
447 (Hawks, 2013; Vattathil and Akey, 2015; Racimo et al., 2015). There is a growing  
448 recognition that this process of introgression or gene flow from genetically divergent  
449 ancestral populations played a role in the emergence of modern human populations in  
450 Africa (Beltrame et al., 2016; Ackermann et al., 2016). Considering that introgression or  
451 gene flow were widespread during human origins, the ancient divergence between  
452 archaic and modern human populations that interacted with each other may be one of  
453 the strongest influences on genetic diversity in humans today. The current study  
454 suggests that the effective population size inferred for particular intervals of time in the  
455 past is strongly influenced by the history of introgression or gene flow, even when the  
456 proportion of genetic variation derived from such introgression amounts only to a few  
457 percent of the ancestry of present-day people. This genetic contribution is very likely to  
458 have given rise to adaptive genetic variants that were valuable for modern human  
459 populations (Hawks and Cochran, 2006; Hawks et al., 2008; Vattathil and Akey, 2015;  
460 Ackermann et al., 2016). To the extent that such introgression or gene flow may also  
461 have occurred in earlier phases of human evolution, it was likely one of the key factors  
462 contributing to the success of human ancestors.

463

464

465 **References**

- 466 Ackermann, R.R., Mackay, A. and Arnold, M.L., 2016. The Hybrid Origin of “Modern”  
467 Humans. *Evol. Biol.*, 43:1-11.
- 468 Beltrame, M.H., Rubel, M.A. and Tishkoff, S.A., 2016. Inferences of African evolutionary  
469 history from genomic data. *Current Opinion in Genetics & Development*, 41:159-  
470 166.
- 471 Berger, L.R., Hawks, J., de Ruiter, D.J., et al. 2015. *Homo naledi*, a new species of the  
472 genus *Homo* from the Dinaledi Chamber, South Africa. *Elife*, 4:e09560.
- 473 Bräuer, G., 2008. The origin of modern anatomy: by speciation or intraspecific  
474 evolution? *Evol. Anthropol.* 17:22-37.
- 475 Currat, M. and Excoffier, L., 2011. Strong reproductive isolation between humans and  
476 Neanderthals inferred from observed patterns of introgression. *Proc. Nat. Acad.*  
477 *Sci. U.S.A.* 108:15129-15134.
- 478 Evans, P.D., Mekel-Bobrov, N., Vallender, E.J., et al. 2006. Evidence that the adaptive  
479 allele of the brain size gene microcephalin introgressed into *Homo sapiens* from  
480 an archaic *Homo* lineage. *Proc. Nat. Acad. Sci. U.S.A.*, 103:18178-18183.
- 481 Fu, Q., Hajdinjak, M., Moldovan, O.T., et al. 2015. An early modern human from  
482 Romania with a recent Neanderthal ancestor. *Nature*, 524:216-219.
- 483 Green, R.E., Krause, J., Briggs, A.W., et al. 2010. A draft sequence of the Neandertal  
484 genome. *Science*, 328:710-722.
- 485 Hammer, M.F., Woerner, A.E., Mendez, F.L., et al. 2011. Genetic evidence for archaic  
486 admixture in Africa. *Proc. Nat. Acad. Sci. U.S.A.*, 108:15123-15128.

- 487 Hawks, J., 2008. From genes to numbers: effective population sizes in human evolution.  
488 In *Recent advances in palaeodemography* (pp. 9-30). Springer Netherlands.
- 489 Hawks, J., 2013. Significance of Neandertal and Denisovan genomes in human evolution.  
490 *Ann. Rev. Anthropol.*, 42:433-449.
- 491 Hawks, J. and Cochran, G., 2006. Dynamics of adaptive introgression from archaic to  
492 modern humans. *PaleoAnthropology*, 2006:101-115.
- 493 Hawks, J., Cochran, G., Harpending, H.C. and Lahn, B.T., 2008. A genetic legacy from  
494 archaic *Homo*. *Trends Genet.*, 24:19-23.
- 495 Hsieh, P., Veeramah, K.R., Lachance, J., et al. 2016a. Whole-genome sequence analyses  
496 of Western Central African Pygmy hunter-gatherers reveal a complex  
497 demographic history and identify candidate genes under positive natural  
498 selection. *Genome Res.*, 26:279-290.
- 499 Hsieh, P., Woerner, A.E., Wall, J.D., et al. 2016b. Model-based analyses of whole-  
500 genome data reveal a complex evolutionary history involving archaic  
501 introgression in Central African Pygmies. *Genome Res.*, 26:291-300.
- 502 Huff, C.D., Xing, J., Rogers, A.R., et al. 2010. Mobile elements reveal small population  
503 size in the ancient ancestors of *Homo sapiens*. *Proc. Nat. Acad. Sci. U.S.A.*,  
504 107:2147-2152.
- 505 Lachance, J., Vernot, B., Elbers, C.C., et al. 2012. Evolutionary history and adaptation  
506 from high-coverage whole-genome sequences of diverse African hunter-  
507 gatherers. *Cell*, 150:457-469.



- 508 Li, H. and Durbin, R., 2011. Inference of human population history from individual  
509 whole-genome sequences. *Nature*, 475:493-496.
- 510 Mallick, S., Li, H., Lipson, M., et al. 2016. The Simons Genome Diversity Project: 300  
511 genomes from 142 diverse populations. *Nature*, 538:201-206.
- 512 Meyer, M., Arsuaga, J.L., de Filippo, C., et al. 2016. Nuclear DNA sequences from the  
513 Middle Pleistocene Sima de los Huesos hominins. *Nature*, 531:504-507.
- 514 Meyer, M., Kircher, M., Gansauge, M.T., et al. 2012. A high-coverage genome sequence  
515 from an archaic Denisovan individual. *Science*, 338:222-226.
- 516 Plagnol, V. and Wall, J.D., 2006. Possible ancestral structure in human populations. *PLoS*  
517 *Genet.*, 2:e105.
- 518 Prüfer, K., Racimo, F., Patterson, N., et al. 2014. The complete genome sequence of a  
519 Neanderthal from the Altai Mountains. *Nature*, 505:43-49.
- 520 Racimo, F., Sankararaman, S., Nielsen, R. et al. 2015. Evidence for archaic adaptive  
521 introgression in humans. *Nat. Rev. Genet.*, 16:359-371.
- 522 Reich, D., Green, R.E., Kircher, M., et al. 2010. Genetic history of an archaic hominin  
523 group from Denisova Cave in Siberia. *Nature*, 468:1053-1060.
- 524 Reich, D., Patterson, N., Kircher, M., et al. 2011. Denisova admixture and the first  
525 modern human dispersals into Southeast Asia and Oceania. *Am. J. Hum. Genet.*,  
526 89:516-528.
- 527 Sankararaman, S., Mallick, S., Dannemann, M., et al. 2014. The genomic landscape of  
528 Neanderthal ancestry in present-day humans. *Nature*, 507:354-357.

- 529 Schaffner, S.F., Foo, C., Gabriel, S., et al. 2005. Calibrating a coalescent simulation of  
530 human genome sequence variation. *Genome Res.*, 15:1576-1583.
- 531 Stringer, C., 2016. The origin and evolution of *Homo sapiens*. *Phil. Trans. R. Soc. B*,  
532 371:20150237.
- 533 Sugden, L.A. and Ramachandran, S., 2016. Integrating the signatures of demic expansion  
534 and archaic introgression in studies of human population genomics. *Current*  
535 *Opinion in Genetics & Development*, 41:140-149.
- 536 Vattathil, S. and Akey, J.M., 2015. Small amounts of archaic admixture provide big  
537 insights into human history. *Cell*, 163:281-284.
- 538 Vernet, B. and Akey, J.M., 2015. Complex history of admixture between modern humans  
539 and Neandertals. *Am. J. Hum. Genet.*, 96:448-453.
- 540

541 **Figure 1. History of human effective population size based upon PSMC of whole**  
542 **genomes.** In the top panel, the first PSMC inferences of human population history from  
543 Li and Durbin (2011) were based upon draft genomes from Yoruba, European ancestry,  
544 Korean, and Chinese individuals. The middle panel shows the results of PSMC analysis  
545 from Prüfer et al. (2013) including individuals from 11 diverse human populations and  
546 the Denisova and Altai Neandertal genomes. The bottom panel shows analyses from  
547 Mallick et al. (2016), including individuals from 3 African hunter-gatherer populations  
548 (Mbuti, Ju|'Hoan, and †Khomani San), 3 African agricultural and pastoral societies, and  
549 one French individual. The charts have different scales based on whether they leave  
550 data in a mutation time scale or attempt a conversion to years; all are presented with  
551 the x-axis (time dimension) as a logarithmic value. Mallick et al. (2016, bottom) did not  
552 report any inference for times earlier than 500,000 years. Despite the great variety  
553 evidenced in the inference of effective population size during the last 100,000 years of  
554 each population, every modern human genome gives substantially similar results for the  
555 time intervals prior to 100,000 years ago. All have a clear “wave” of larger inferred  
556 effective population size with a “crest” or maximum around 200,000 years ago, and a  
557 preceding “trough” or minimum around 500,000-800,000 years ago (beyond the  
558 timescale represented by Mallick et al., 2016).  
559

560 **Figure 1 (continued).**

561

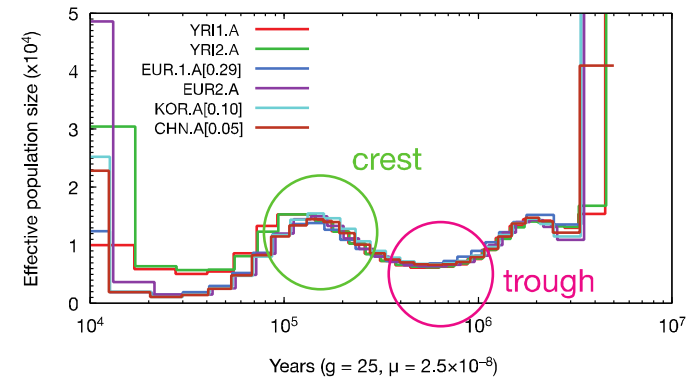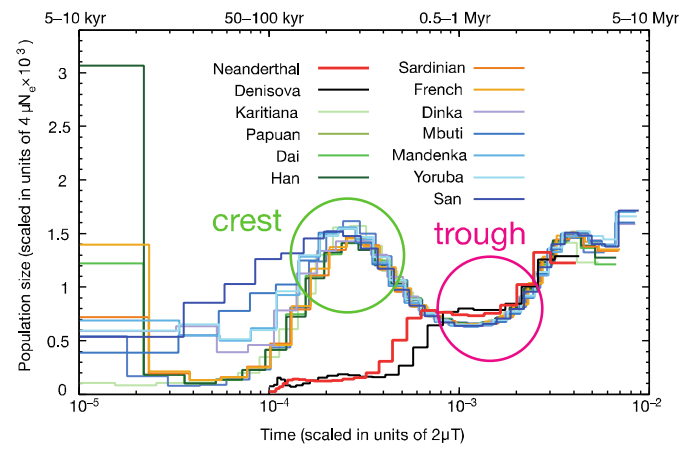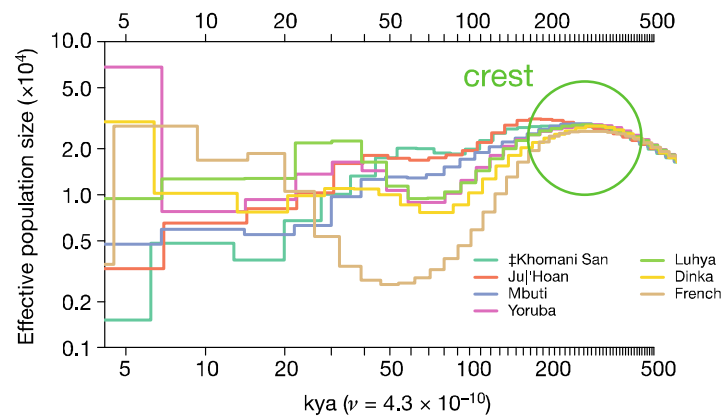

562

563 **Figure 2: Population model used in this study.**  $P_1$  is a Wright-Fisher population of size  $N$   
564 that existed infinitely far back in time.  $P_2$  came into existence instantaneously by  
565 diverging from  $P_1$  at time  $T_0$  in the past. From that time the two populations exchanged  
566 migrants at rate  $m$ , until time  $T_i$ , when a fraction  $q$  of  $P_1$  is derived by introgression from  
567  $P_2$ .  
568

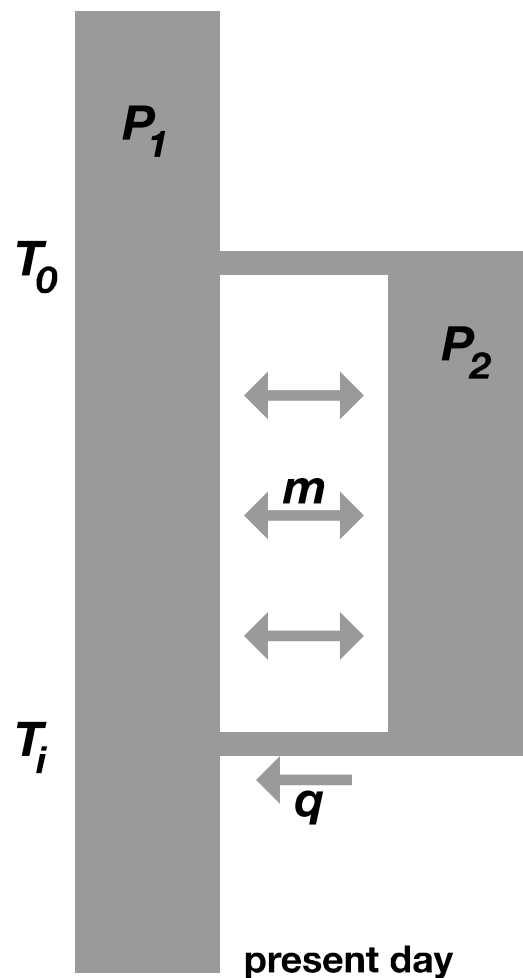

569  
570

571 **Figure 3. Comparing population histories with introgression to the null model.** Panes  
572 (a) and (b) show the realized probability of coalescence and the inferred effective  
573 population size in a Wright-Fisher population model with no introgression or migration.  
574 Each data point represents the number of genealogies coalescing in a time increment of  
575  $0.05N$  generations. In (b), the effective size is estimated in each time increment, and the  
576 blue line represents a moving average of 10 time increments. Panes (c) and (d) show the  
577 same results for a population history in which 5% of the population derives from  
578 introgression  $N$  generations in the past, from a second population that diverged  $4N$   
579 generations ago. There is an abrupt shift in the realized probability of coalescence  
580 corresponding to the divergence of the two populations  $4N$  generations in the past.  
581 Points become more scattered moving toward the right (more ancient times) because  
582 the number of genealogies that coalesce in the most ancient time intervals is very small,  
583 lending sampling noise to the data.  
584  
585

586 **Figure 3 (continued).**

587

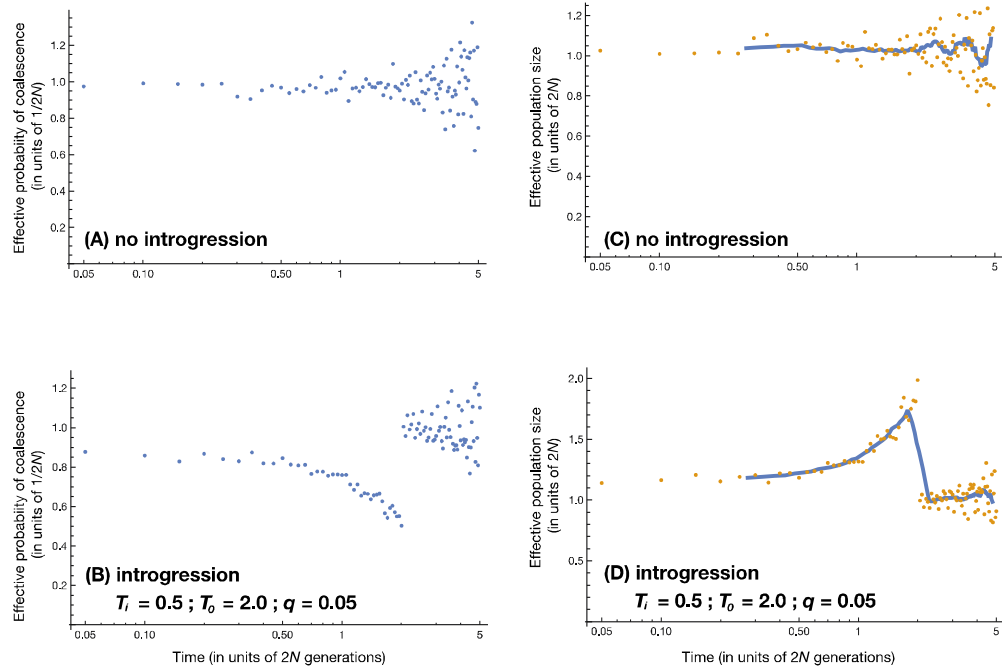

588

589

590 **Figure 4. Adding mutations to the genealogies turns a sharp transition into a wave.** (A)

591 and (B) are based on the same simulation run, also illustrated in Figure 3c and 3d. (A)

592 shows the effective population size for each interval as estimated from the fraction of

593 loci with TMRCA in that interval; (B) shows the effective population size for each interval

594 based upon the pairwise counts of mutations. In both (A) and (B), the blue line

595 represents a moving average of the surrounding data points. Mutation adds a random

596 component that tends to smooth sharp transitions in the dataset.

597

598



599 **Figure 4 (continued).**

600

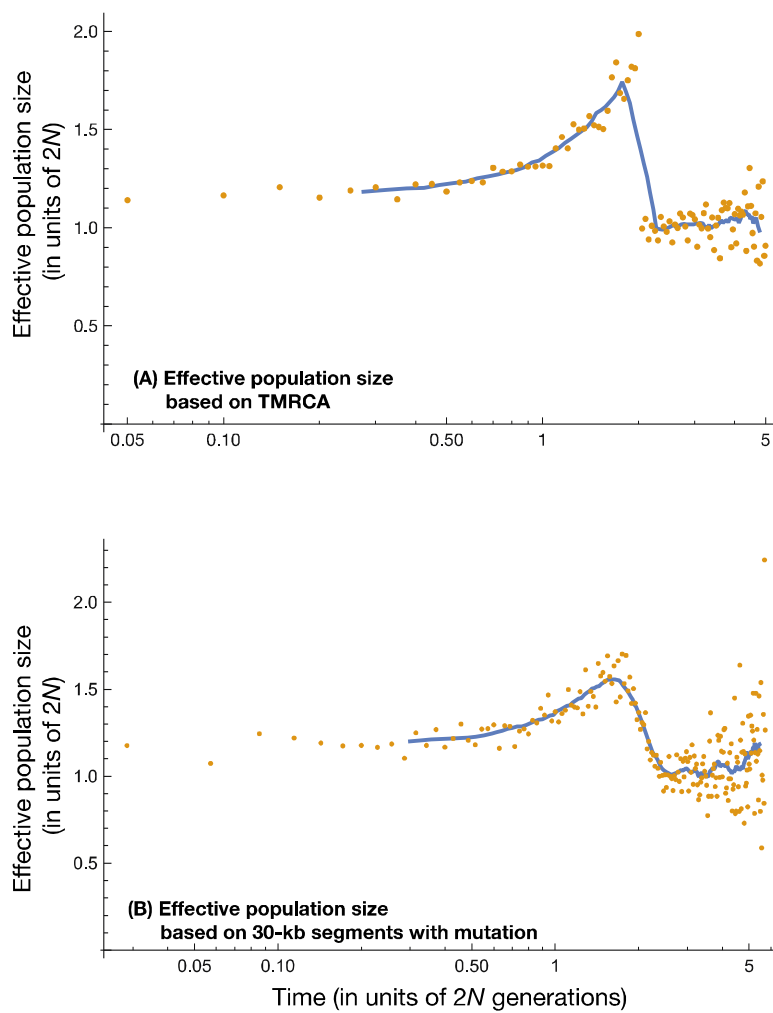

601

602

603 **Figure 5. Sudden introgression versus long-term gene flow.** In (A), 0.2 individuals per  
604 generation transfer between the two genetically divergent ancestral populations  
605 between  $T_0$  and  $T_i$ , and there is no sudden introgression at  $T_i$ . In (B), there is no gene  
606 flow between the two populations, and 10% of population  $P_1$  is the result of a sudden  
607 introgression from  $P_2$  at time  $T_i$ . Both these scenarios result in very similar outcomes,  
608 with a wave of inferred effective population size at the same time and approximately  
609 the same magnitude. The upturn of inferred effective size in the rightmost (oldest) time  
610 intervals is not a reliable outcome of the simulations; this reflects the small sample of  
611 genealogies with the oldest coalescence times.

612

613

614 **Figure 5 (continued).**

615

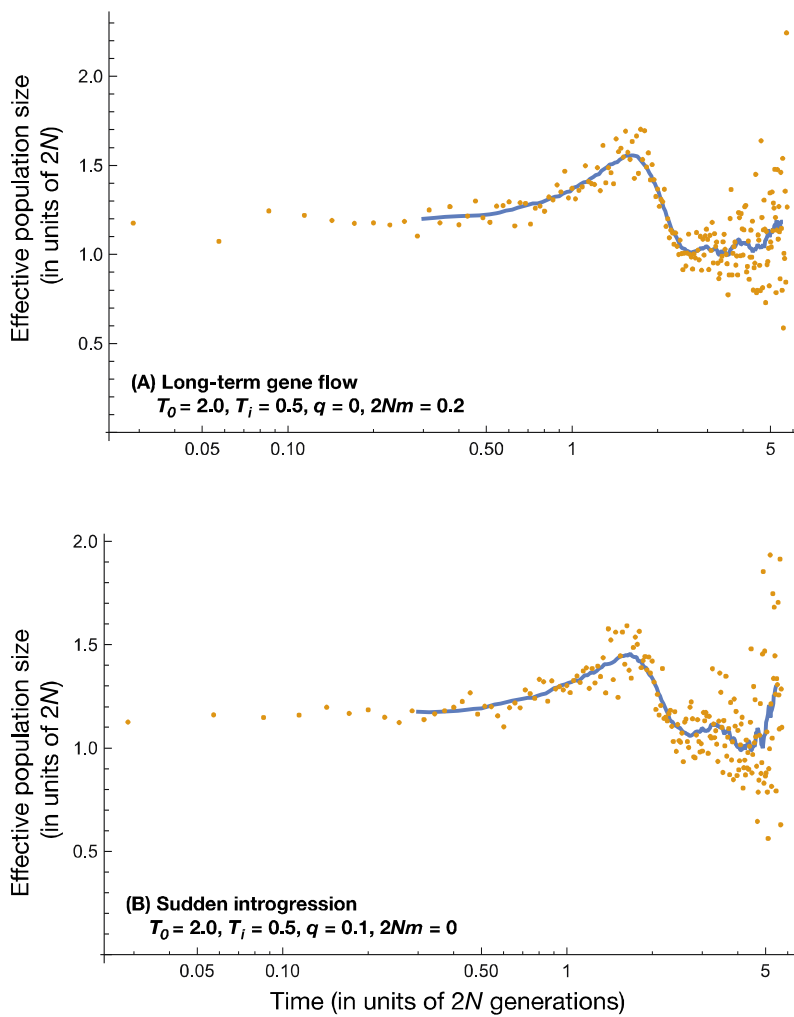

616

617

618

619

620

621 **Figure 6. Amplitude of the wave is a function of the amount of introgression.** Each  
622 panel represents an identical population model with introgression at 0.07 times  $2N$   
623 generations and divergence of  $P_1$  and  $P_2$  at 1.2 times  $2N$  generations. In (A) 2%  
624 introgression; (B) 3% introgression; (C) 5% introgression; and (D) 8% introgression. The  
625 amplitude of the wave increases with greater introgression. If  $N = 10000$  individuals and  
626 generations are 25 years long, then introgression in this model occurred approximately  
627 35,000 years ago and the populations diverged approximately 600,000 years ago,  
628 roughly corresponding to some values estimated for African ancestral introgression.  
629

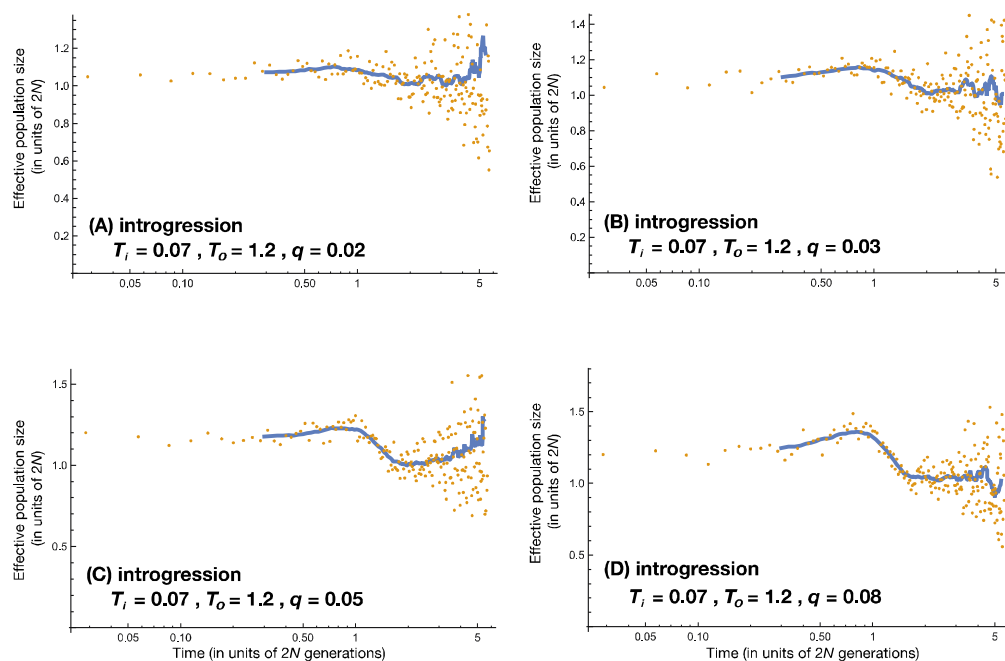

630

631

632

633 **Figure 7. Leading edge of the wave reflects time of divergence of introgression source**  
634 **population.** Each panel presents results with identical parameters except for the time of  
635 origin of the genetically divergent source population for introgression ( $T_0$ ), which is  
636 indicated by the vertical red line. Migration ( $2Nm$ ) in all panels is 0.1 individual per  
637 generation; the fraction of introgression ( $q$ ) is 10%. Older time of origin also  
638 corresponds to greater wave amplitude, because the slight reduction in coalescence  
639 probability is cumulative over time in its effect.  
640  
641

642 **Figure 7 (continued).**

643

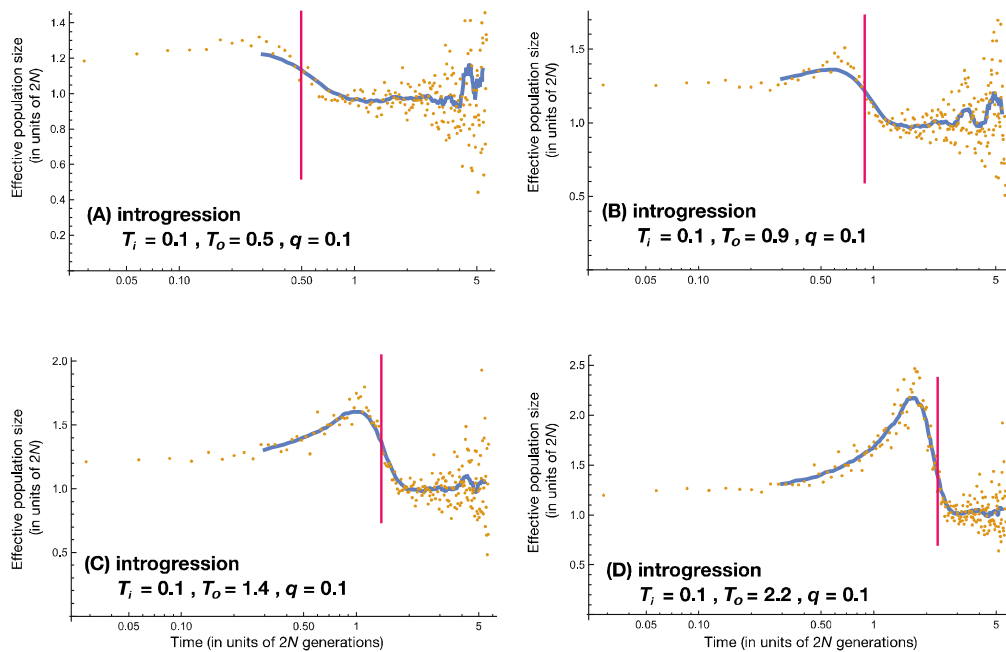

644

645
